# Supplementary material for: GeneSegNet: a deep learning framework for cell segmentation by integrating gene expression and imaging
Source: PubMed Central journal article supplement (PMC10585768; doi:10.1186/s13059-023-03054-0), 2023-10-19

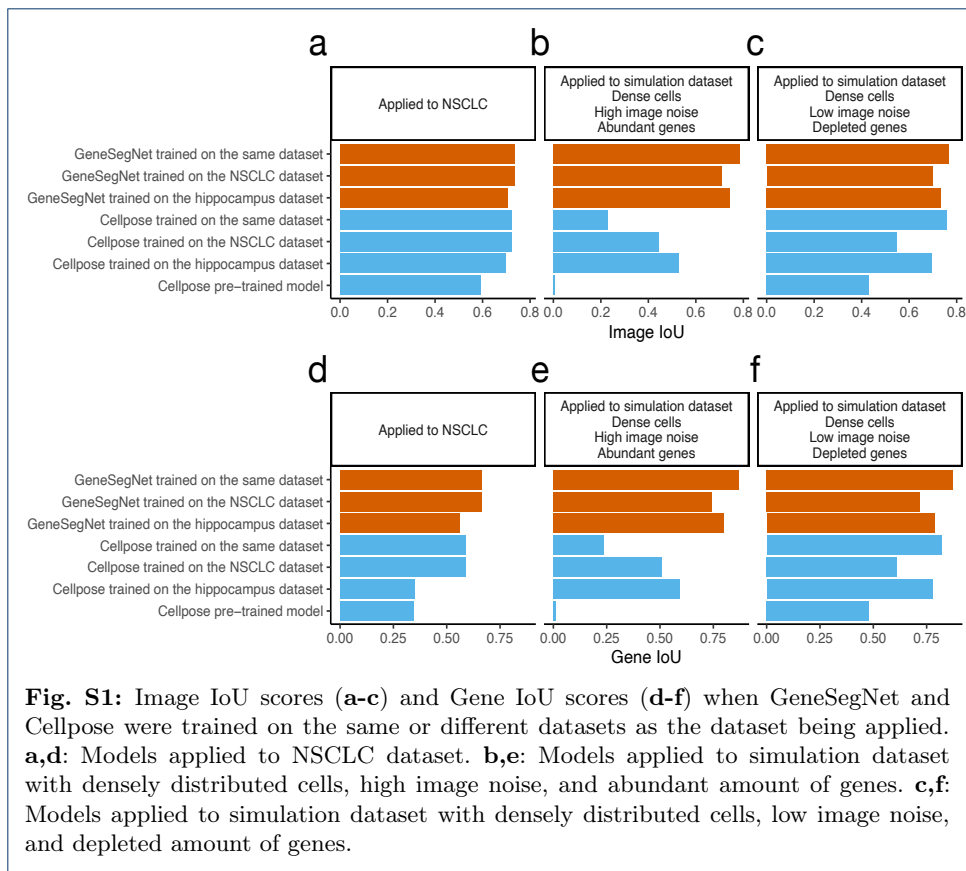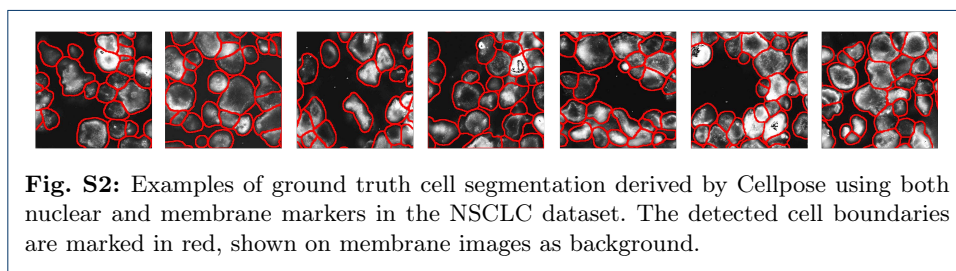

**Table S1: Running time and memory usage of GeneSegNet.**

| Dataset                   | GeneSegNet Stage | Runtime  | Memory Usage    | Configuration                                                                                     |
|---------------------------|------------------|----------|-----------------|---------------------------------------------------------------------------------------------------|
| Simulation (one scenario) | Training         | 330 Min  | 8GB GPU Memory  | Image Size = 256 × 256, Epoch = 500, Batch Size = 8, Training and Validation Samples = 344 + 100  |
| NSCLC                     |                  | 720 Min  |                 | Image Size = 256 × 256, Epoch = 500, Batch Size = 8, Training and Validation Samples = 961 + 290  |
| Hippocampus               |                  | 1140 Min |                 | Image Size = 256 × 256, Epoch = 500, Batch Size = 8, Training and Validation Samples = 2098 + 420 |
| Simulation (one scenario) | Inference        | 20.0 Min | 20GB CPU Memory | Image Size = 7248 × 3624                                                                          |
| NSCLC                     |                  | 15.0 Min | 10GB CPU Memory | Image Size = 5472 × 3648                                                                          |
| Hippocampus               |                  | 20.0 Min | 30GB CPU Memory | Image Size = 6130 × 5548                                                                          |

Table S2: Notation Table

| Notation                                          | Description                                                                                                                                                                                   |
|---------------------------------------------------|-----------------------------------------------------------------------------------------------------------------------------------------------------------------------------------------------|
| $I$                                               | input (patch) image of $W \times H$ resolution, $I \in [0, 1]^{W \times H}$                                                                                                                   |
| $g_l$                                             | coordinate of the $l$ -th RNA in the lattice of $I$ , $g_l \in \{1, \dots, W\} \times \{1, \dots, H\}$                                                                                        |
| $G$                                               | input RNA location map, $G \in [0, 1]^{W \times H}$                                                                                                                                           |
| $\mathbf{I}$                                      | set of a total of $N$ training (patch) images, $\mathbf{I} = \{I_n\}_{n=1}^N$                                                                                                                 |
| $\mathbf{g}$                                      | set of coordinates of a total of $L$ RNAs in image $I$ , $\mathbf{g} = \{g_l\}_{l=1}^L$                                                                                                       |
| $\mathbf{G}$                                      | set of a total of $N$ RNA location maps of the training images $\mathbf{I}$ , $\mathbf{G} = \{G_n\}_{n=1}^N$                                                                                  |
| $f(\cdot; \theta)$                                | neural network of GeneSegNet parameterized by $\theta$                                                                                                                                        |
| $\hat{M}/M$                                       | network estimation/training label for the confidence map, $\hat{M} \in [0, 1]^{W \times H}$ , $M \in \{0, 1\}^{W \times H}$                                                                   |
| $\hat{C}/C$                                       | network estimation/training label for the center map, $\hat{C} \in [0, 1]^{W \times H}$ , $C \in \{0, 1\}^{W \times H}$                                                                       |
| $\hat{V}/V$                                       | network estimation/training label for the offset map, $\hat{V}, V \in \mathbb{R}^{2 \times W \times H}$                                                                                       |
| $\hat{\mathbf{Y}}/\mathbf{Y}$                     | set of network outputs/training labels for the training images $\mathbf{I}$ , $\hat{\mathbf{Y}} = \{(\hat{M}_n, \hat{C}_n, \hat{V}_n)\}_{n=1}^N$ , $\mathbf{Y} = \{(M_n, C_n, V_n)\}_{n=1}^N$ |
| $\hat{S}_k/S_k$                                   | network estimation/training label for the mask of $k$ -th cell instance in image $I$ , $S_k, S_k \in \{0, 1\}^{W \times H}$                                                                   |
| $\hat{o}_k/o_k$                                   | network estimation/training label for center coordinate of $k$ -th cell instance in the lattice of $I$                                                                                        |
| $\mathcal{L}, \mathcal{L}_{ce}, \mathcal{L}_{l2}$ | loss functions used for network optimization                                                                                                                                                  |

**Table S3:** The ablation study for the choice of hyper-parameters (optimizer, learning rate, variance  $\sigma$ ) in simulation dataset with image and gene IoU scores. The performances corresponding to the chosen parameters are highlighted in bold.

| Optimizer | Learning Rate | Dataset                                           | Image IoU         |       |              |       |       | Gene IoU          |       |              |       |       | Dataset | Image IoU         |              |       |       |       | Gene IoU          |              |       |       |                                                  |       |       |       |       |       |       |       |       |       |       |       |       |       |       |       |       |       |       |       |      |
|-----------|---------------|---------------------------------------------------|-------------------|-------|--------------|-------|-------|-------------------|-------|--------------|-------|-------|---------|-------------------|--------------|-------|-------|-------|-------------------|--------------|-------|-------|--------------------------------------------------|-------|-------|-------|-------|-------|-------|-------|-------|-------|-------|-------|-------|-------|-------|-------|-------|-------|-------|-------|------|
|           |               |                                                   | Variance $\sigma$ |       |              |       |       | Variance $\sigma$ |       |              |       |       |         | Variance $\sigma$ |              |       |       |       | Variance $\sigma$ |              |       |       |                                                  |       |       |       |       |       |       |       |       |       |       |       |       |       |       |       |       |       |       |       |      |
| SGD       | 0.0001        | Dense cells<br>High image noise<br>Abundant genes | 0.685             | 0.682 | 0.731        | 0.761 | 0.746 | 0.734             | 0.731 | 0.831        | 0.854 | 0.841 | 0.644   | 0.677             | 0.758        | 0.699 | 0.673 | 0.766 | 0.808             | 0.863        | 0.824 | 0.82  | Dense cells<br>Low image noise<br>Depleted genes | 0.665 | 0.741 | 0.762 | 0.738 | 0.700 | 0.811 | 0.844 | 0.868 | 0.84  | 0.841 | 0.668 | 0.705 | 0.741 | 0.719 | 0.726 | 0.796 | 0.828 | 0.849 | 0.831 | 0.85 |
|           | 0.001         |                                                   | 0.735             | 0.74  | 0.755        | 0.769 | 0.75  | 0.837             | 0.826 | 0.843        | 0.858 | 0.838 | 0.658   | 0.705             | 0.741        | 0.719 | 0.726 | 0.796 | 0.828             | 0.849        | 0.831 | 0.85  |                                                  | 0.638 | 0.644 | 0.661 | 0.653 | 0.658 | 0.759 | 0.766 | 0.802 | 0.781 | 0.829 |       |       |       |       |       |       |       |       |       |      |
|           | 0.01          |                                                   | 0.703             | 0.794 | 0.702        | 0.687 | 0.695 | 0.772             | 0.764 | 0.781        | 0.811 | 0.753 | 0.778   | 0.653             | 0.650        | 0.745 | 0.733 | 0.690 | 0.768             | 0.779        | 0.807 | 0.851 |                                                  | 0.862 | 0.688 | 0.716 | 0.695 | 0.674 | 0.734 | 0.808 | 0.833 | 0.83  | 0.805 | 0.854 |       |       |       |       |       |       |       |       |      |
|           | 0.1           |                                                   | 0.668             | 0.721 | 0.740        | 0.774 | 0.688 | 0.712             | 0.814 | 0.836        | 0.86  | 0.751 | 0.668   | 0.716             | 0.695        | 0.674 | 0.734 | 0.808 | 0.833             | 0.83         | 0.805 | 0.854 |                                                  | 0.688 | 0.716 | 0.695 | 0.674 | 0.734 | 0.808 | 0.833 | 0.83  | 0.805 | 0.854 |       |       |       |       |       |       |       |       |       |      |
|           | 0.0001        |                                                   | 0.712             | 0.732 | 0.774        | 0.783 | 0.74  | 0.802             | 0.821 | 0.853        | 0.877 | 0.836 | 0.710   | 0.744             | <b>0.764</b> | 0.752 | 0.750 | 0.823 | 0.847             | <b>0.871</b> | 0.851 | 0.862 |                                                  | 0.688 | 0.716 | 0.695 | 0.674 | 0.734 | 0.808 | 0.833 | 0.83  | 0.805 | 0.854 |       |       |       |       |       |       |       |       |       |      |
| 0.001     | 0.693         |                                                   | 0.707             | 0.752 | 0.767        | 0.764 | 0.760 | 0.781             | 0.841 | 0.858        | 0.855 | 0.659 | 0.669   | 0.656             | 0.712        | 0.713 | 0.754 | 0.803 | 0.788             | 0.829        | 0.845 | 0.688 |                                                  | 0.716 | 0.695 | 0.674 | 0.734 | 0.808 | 0.833 | 0.83  | 0.805 | 0.854 |       |       |       |       |       |       |       |       |       |       |      |
| 0.01      | 0.665         |                                                   | 0.679             | 0.716 | 0.705        | 0.731 | 0.710 | 0.727             | 0.824 | 0.79         | 0.832 | 0.661 | 0.658   | 0.754             | 0.718        | 0.699 | 0.8   | 0.792 | 0.858             | 0.831        | 0.844 | 0.688 |                                                  | 0.716 | 0.695 | 0.674 | 0.734 | 0.808 | 0.833 | 0.83  | 0.805 | 0.854 |       |       |       |       |       |       |       |       |       |       |      |
| 0.0001    | 0.731         |                                                   | 0.719             | 0.763 | <b>0.779</b> | 0.737 | 0.812 | 0.813             | 0.85  | <b>0.865</b> | 0.835 | 0.708 | 0.727   | 0.759             | 0.761        | 0.738 | 0.822 | 0.837 | 0.86              | 0.861        | 0.856 | 0.688 |                                                  | 0.716 | 0.695 | 0.674 | 0.734 | 0.808 | 0.833 | 0.83  | 0.805 | 0.854 |       |       |       |       |       |       |       |       |       |       |      |
| 0.001     | 0.679         |                                                   | 0.747             | 0.748 | 0.733        | 0.77  | 0.723 | 0.83              | 0.838 | 0.838        | 0.854 | 0.722 | 0.739   | 0.774             | 0.748        | 0.746 | 0.828 | 0.842 | 0.884             | 0.844        | 0.86  | 0.688 |                                                  | 0.716 | 0.695 | 0.674 | 0.734 | 0.808 | 0.833 | 0.83  | 0.805 | 0.854 |       |       |       |       |       |       |       |       |       |       |      |
| 0.01      | 0.697         |                                                   | 0.69              | 0.714 | 0.713        | 0.716 | 0.763 | 0.745             | 0.818 | 0.824        | 0.822 | 0.660 | 0.692   | 0.702             | 0.730        | 0.721 | 0.79  | 0.819 | 0.834             | 0.836        | 0.846 | 0.688 |                                                  | 0.716 | 0.695 | 0.674 | 0.734 | 0.808 | 0.833 | 0.83  | 0.805 | 0.854 |       |       |       |       |       |       |       |       |       |       |      |

**Table S4:** The ablation study for the choice of hyper-parameters (optimizer, learning rate, variance  $\sigma$ ) in NSCLC dataset with image and gene IoU scores. The performances corresponding to the chosen parameters are highlighted in bold.

| Optimizer | Learning Rate | Dataset | Image IoU         |       |       |              |       | Gene IoU          |       |       |              |       |
|-----------|---------------|---------|-------------------|-------|-------|--------------|-------|-------------------|-------|-------|--------------|-------|
|           |               |         | Variance $\sigma$ |       |       |              |       | Variance $\sigma$ |       |       |              |       |
| SGD       | 0.0001        | NSCLC   | 0.688             | 0.683 | 0.676 | 0.692        | 0.67  | 0.759             | 0.752 | 0.747 | 0.766        | 0.74  |
|           | 0.001         |         | 0.708             | 0.696 | 0.672 | 0.702        | 0.692 | 0.787             | 0.766 | 0.744 | 0.779        | 0.765 |
|           | 0.01          |         | 0.673             | 0.634 | 0.685 | 0.714        | 0.701 | 0.746             | 0.699 | 0.756 | 0.8          | 0.781 |
|           | 0.1           |         | 0.659             | 0.647 | 0.648 | 0.676        | 0.654 | 0.718             | 0.71  | 0.712 | 0.748        | 0.716 |
| Adam      | 0.0001        |         | 0.711             | 0.663 | 0.697 | 0.715        | 0.707 | 0.797             | 0.725 | 0.768 | 0.8          | 0.786 |
|           | 0.001         |         | 0.713             | 0.673 | 0.708 | 0.72         | 0.714 | 0.798             | 0.745 | 0.787 | 0.804        | 0.798 |
|           | 0.01          |         | 0.687             | 0.69  | 0.657 | 0.691        | 0.699 | 0.757             | 0.764 | 0.718 | 0.764        | 0.773 |
|           | 0.1           |         | 0.668             | 0.629 | 0.633 | 0.684        | 0.649 | 0.727             | 0.693 | 0.699 | 0.756        | 0.712 |
| AdamW     | 0.0001        |         | 0.721             | 0.685 | 0.691 | 0.728        | 0.709 | 0.804             | 0.755 | 0.764 | 0.809        | 0.787 |
|           | 0.001         |         | 0.719             | 0.689 | 0.686 | <b>0.734</b> | 0.711 | 0.801             | 0.76  | 0.756 | <b>0.817</b> | 0.796 |
|           | 0.01          |         | 0.692             | 0.658 | 0.668 | 0.706        | 0.684 | 0.765             | 0.72  | 0.727 | 0.785        | 0.754 |
|           | 0.1           |         | 0.678             | 0.641 | 0.664 | 0.689        | 0.662 | 0.75              | 0.704 | 0.725 | 0.761        | 0.721 |

**Table S5:** The ablation study for the choice of hyper-parameters (optimizer, learning rate, variance  $\sigma$ ) in the hippocampus dataset. The performances corresponding to the chosen parameters are highlighted in bold.

| Optimizer | Learning Rate | Dataset      | Variance $\sigma$ |         |                   |            |         |              |         |          |                   |              |              |              |                |              |                   |         |         |          |            |         |         |         |
|-----------|---------------|--------------|-------------------|---------|-------------------|------------|---------|--------------|---------|----------|-------------------|--------------|--------------|--------------|----------------|--------------|-------------------|---------|---------|----------|------------|---------|---------|---------|
|           |               |              | 3                 |         |                   |            | 5       |              |         |          | 7                 |              |              |              | 9              |              |                   |         |         |          |            |         |         |         |
|           |               | Cell Calling |                   |         | Cell Area (pixel) |            |         | Cell Calling |         |          | Cell Area (pixel) |              |              | Cell Calling |                |              | Cell Area (pixel) |         |         |          |            |         |         |         |
|           |               | 3 pixel      | 5 pixel           | 7 pixel | Avg Area          | Avg Radius | 3 pixel | 5 pixel      | 7 pixel | Avg Area | Avg Radius        | 3 pixel      | 5 pixel      | 7 pixel      | Avg Area       | Avg Radius   | 3 pixel           | 5 pixel | 7 pixel | Avg Area | Avg Radius | 3 pixel | 5 pixel | 7 pixel |
| SGD       | 0.0001        | 37.93        | 18.02             | 10.09   | 1119.47           | 18.88      | 34.33   | 13.89        | 7.02    | 1057.20  | 18.35             | 46.30        | 23.76        | 15.68        | 1297.43        | 20.33        | 38.26             | 18.18   | 1121.01 | 18.90    |            |         |         |         |
|           | 0.001         | 39.84        | 19.58             | 11.63   | 1142.15           | 19.07      | 36.95   | 16.91        | 9.32    | 1109.14  | 18.79             | 47.63        | 24.20        | 16.01        | 1300.04        | 20.35        | 40.02             | 19.92   | 1186    | 11.95    | 19.18      |         |         |         |
|           | 0.01          | 44.20        | 21.90             | 14.80   | 1199.14           | 19.54      | 38.50   | 18.65        | 8.99    | 1103.48  | 18.75             | 46.82        | 24.03        | 15.70        | 1296.82        | 20.34        | 42.01             | 21.88   | 1135    | 11.68    | 19.29      |         |         |         |
|           | 0.1           | 36.89        | 16.72             | 9.05    | 1105.58           | 18.76      | 35.19   | 15.27        | 7.90    | 1064.32  | 18.41             | 45.37        | 23.62        | 15.64        | 1295.36        | 20.31        | 37.74             | 17.56   | 1116.50 | 18.86    |            |         |         |         |
|           | 0.0001        | 36.37        | 16.26             | 8.91    | 1100.74           | 18.72      | 35.56   | 15.76        | 8.18    | 1077.49  | 18.52             | 47.18        | 24.11        | 15.79        | 1299.90        | 20.35        | 40.38             | 20.11   | 1243    | 11.58    | 19.20      |         |         |         |
| Adam      | 0.001         | 42.24        | 21.90             | 14.05   | 1173.87           | 19.34      | 38.23   | 18.27        | 10.70   | 1124.86  | 18.93             | 47.28        | 24.13        | 15.87        | 1300.24        | 20.35        | 44.41             | 23.52   | 1564    | 12.92    | 20.29      |         |         |         |
|           | 0.01          | 41.66        | 20.37             | 13.43   | 1160.96           | 19.23      | 37.77   | 17.83        | 9.95    | 1117.37  | 18.86             | 48.33        | 24.92        | 16.02        | 1311.58        | 20.44        | 42.12             | 22.09   | 1376    | 11.72    | 19.32      |         |         |         |
|           | 0.1           | 39.17        | 18.94             | 11.21   | 1128.84           | 18.96      | 34.95   | 14.30        | 7.44    | 1093.19  | 18.36             | 46.67        | 23.94        | 15.68        | 1298.68        | 20.34        | 38.97             | 18.69   | 1137    | 11.25    | 18.93      |         |         |         |
|           | 0.0001        | 37.55        | 17.18             | 9.40    | 1110.21           | 18.80      | 36.04   | 16.18        | 8.76    | 1083.26  | 18.57             | 49.87        | 25.17        | 16.91        | 1352.35        | 20.76        | 41.64             | 20.41   | 1288    | 11.60    | 19.22      |         |         |         |
|           | 0.001         | 40.45        | 20.22             | 12.70   | 1159.33           | 19.21      | 39.68   | 20.31        | 13.44   | 1153.11  | 19.16             | <b>50.76</b> | <b>25.24</b> | <b>17.88</b> | <b>1364.79</b> | <b>20.85</b> | 43.79             | 23.07   | 1492    | 11.88    | 19.46      |         |         |         |
| AdamW     | 0.01          | 42.75        | 22.82             | 14.77   | 1175.26           | 19.35      | 38.88   | 18.54        | 11.62   | 1126.93  | 18.94             | 48.62        | 24.98        | 16.33        | 1312.21        | 20.44        | 42.81             | 22.78   | 1437    | 11.76    | 19.35      |         |         |         |
|           | 0.1           | 38.51        | 18.47             | 10.62   | 1126.03           | 18.94      | 35.02   | 14.96        | 7.81    | 1062.27  | 18.39             | 48.08        | 24.36        | 16.01        | 1303.32        | 20.37        | 39.47             | 19.21   | 1112    | 11.30    | 18.97      |         |         |         |

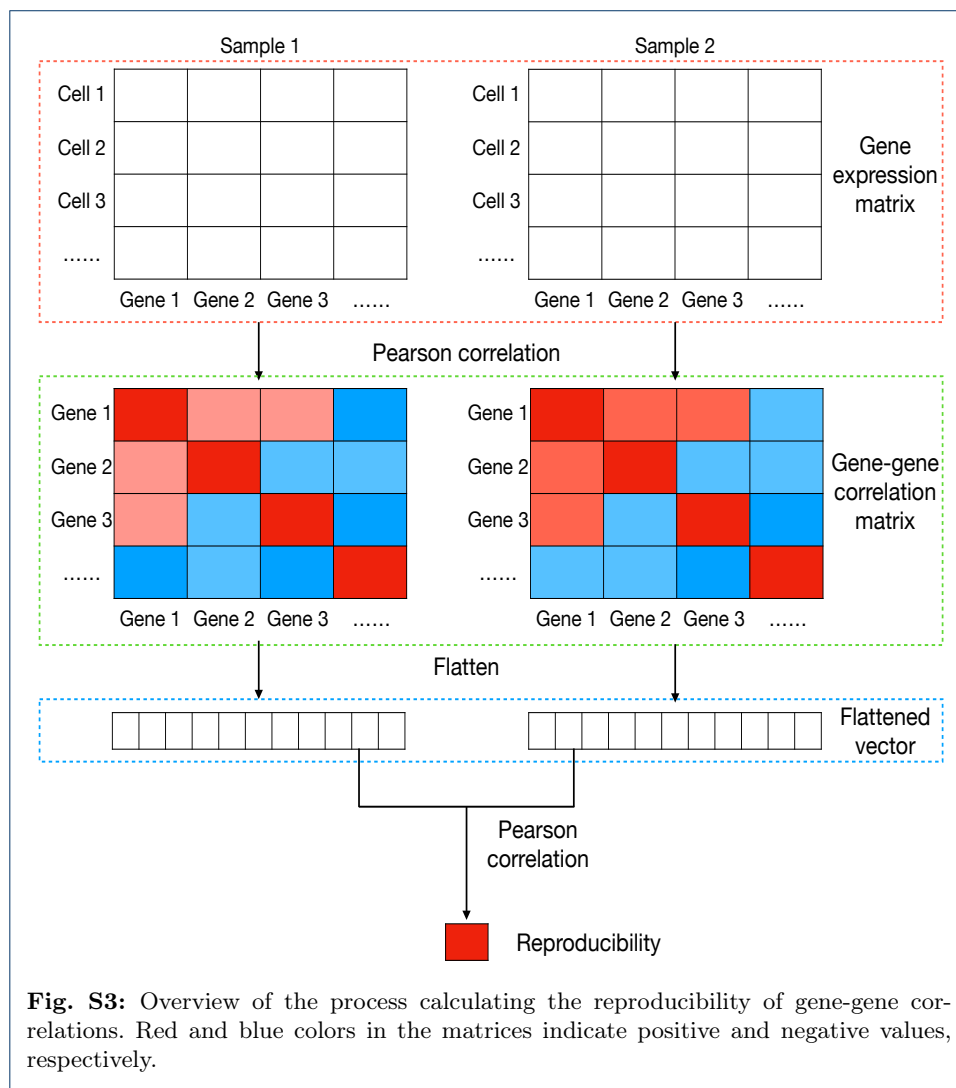

Supplement: 13059_2023_3054_MOESM1_ESM.pdf [file 13059_2023_3054_MOESM1_ESM.pdf]
